# Supplementary material for: Electrodeposited Bi-Au nanocomposite modified carbon paste electrode for the simultaneous determination of copper and mercury
Source: Royal Society of Chemistry journal article supplement (doi:10.1039/c5ra02977e), 2015-01-01
Supplement: c5ra02977e1.pdf [file c5ra02977e1.pdf]

# **Electrodeposited Bi-Au Nano Composites Modified Carbon Paste Electrode for the Simultaneous Determination of Copper and Mercury**

S. Sahoo, A. K. Satpati\* and A. V. R. Reddy

Analytical Chemistry Division, Bhabha Atomic Research Centre, Mumbai-400085, India

\*Corresponding author: A.K.Satpati (email [asatpati@barc.gov.in](mailto:asatpati@barc.gov.in), Phone 91-22-25590326)

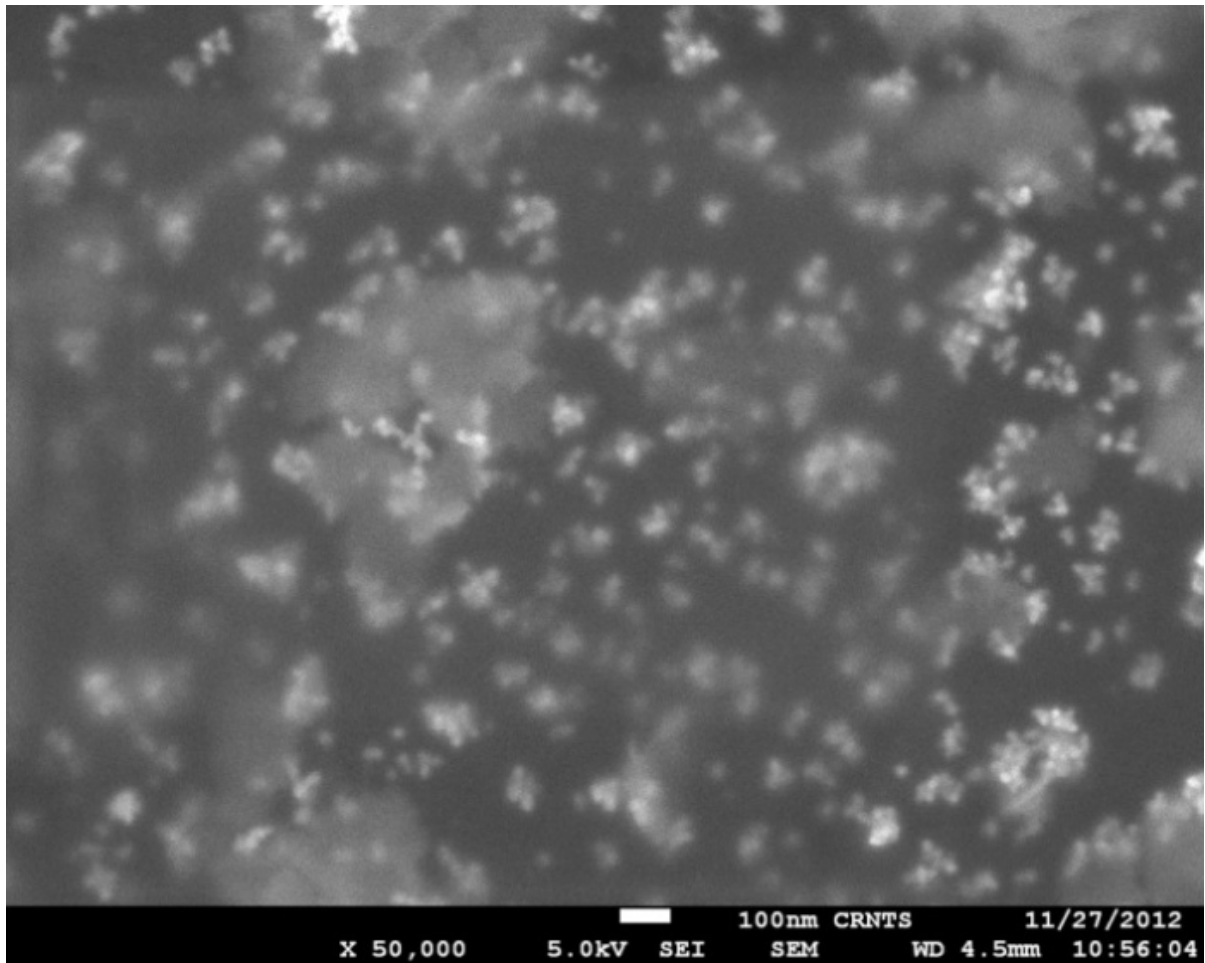

Figure S1. High resolution SEM image of the Bi-AuNPs composite material.

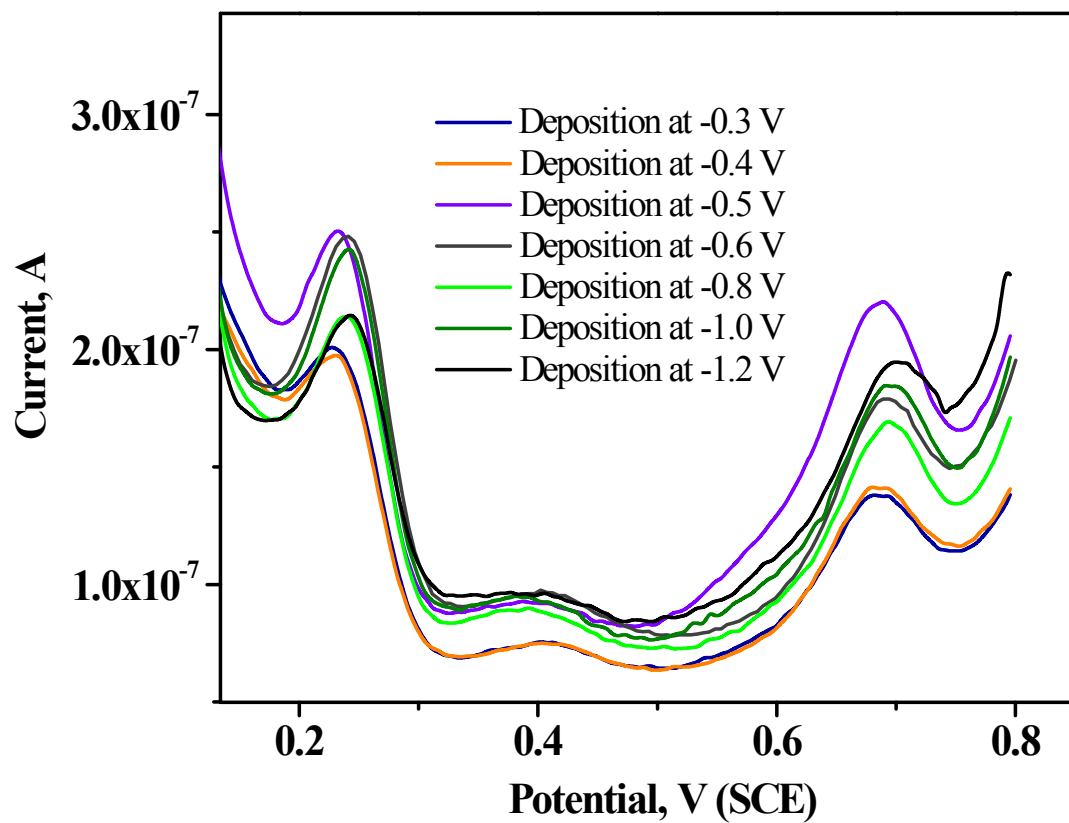

Figure S2. Effect of deposition potential on the stripping peak of  $10 \mu\text{g L}^{-1} \text{Cu}^{2+}$  and  $6 \mu\text{g L}^{-1} \text{Hg}^{2+}$  in 0.1 M acetate supporting electrolyte medium.

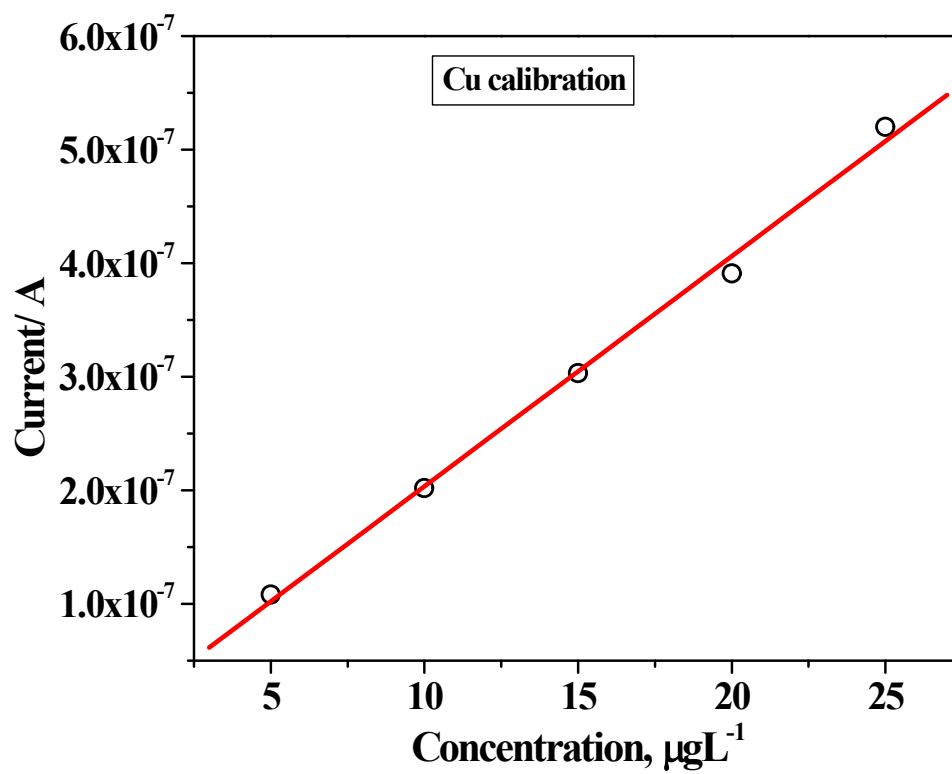

Figure S3. Linear calibration plot of Cu<sup>2+</sup> using the data from Figure 6

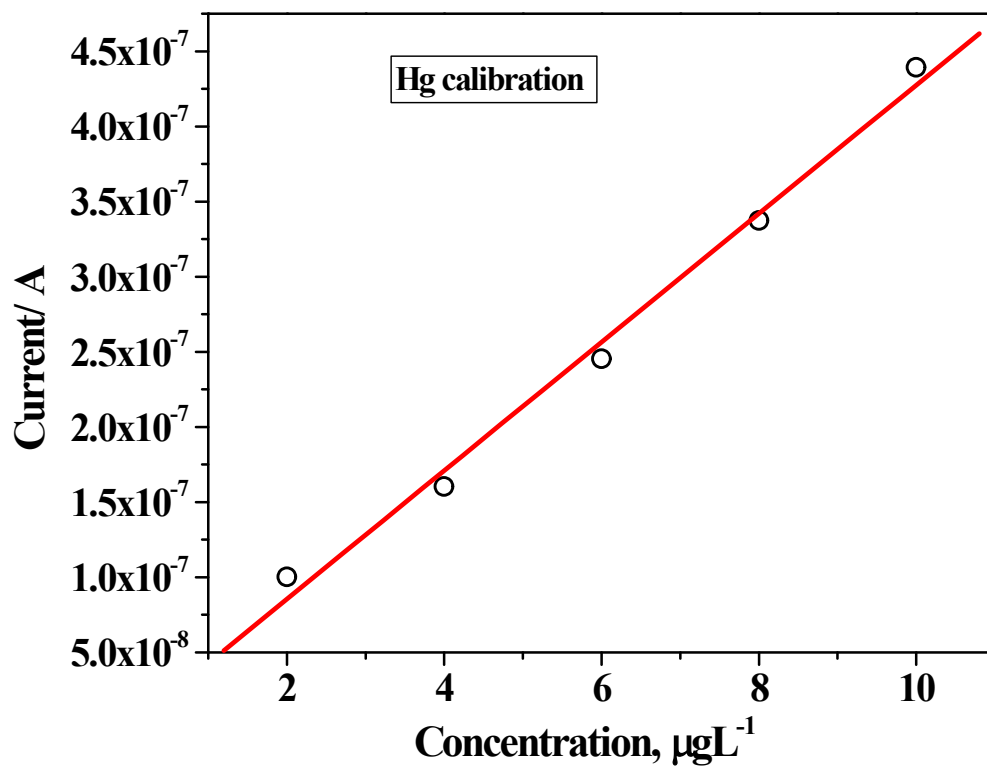

Figure S4. Linear calibration plot of Hg<sup>2+</sup> using the data from Figure 6

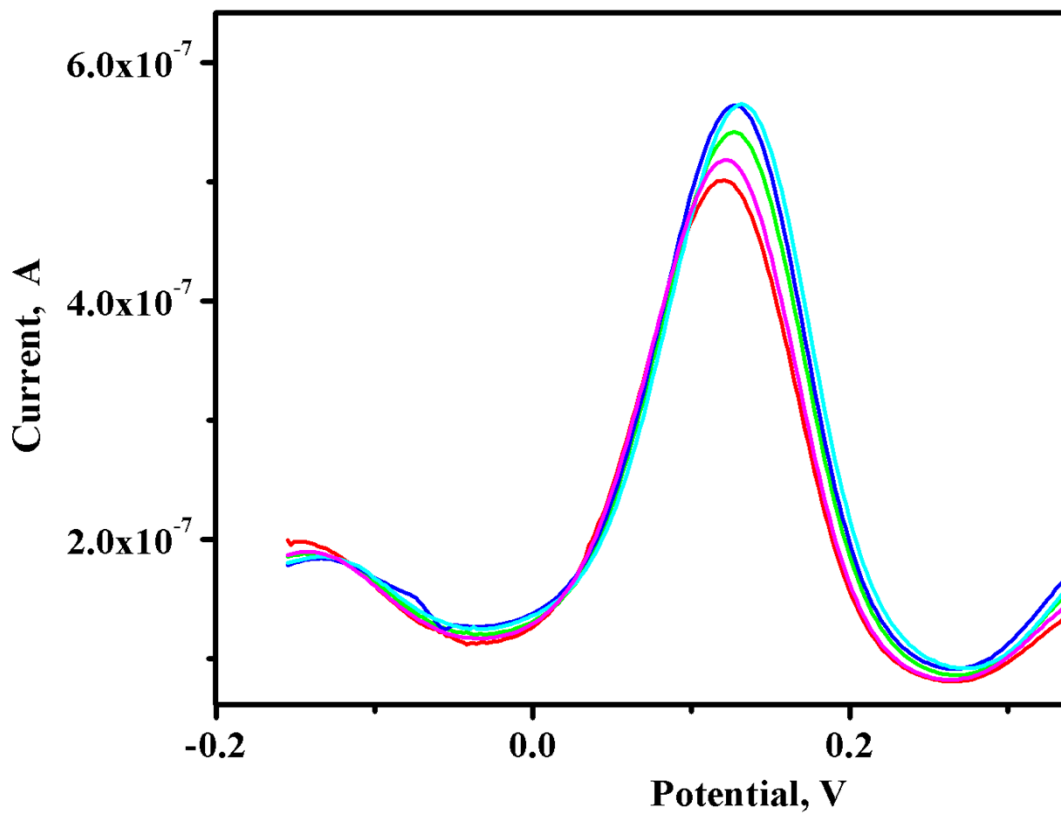

Figure S5. Voltammetric plot of  $\text{Cu}^{2+}$  using AuNPs modified electrode with successive addition of  $\text{Cu}^{2+}$  at  $5 \mu\text{L}^{-1}$  each time.

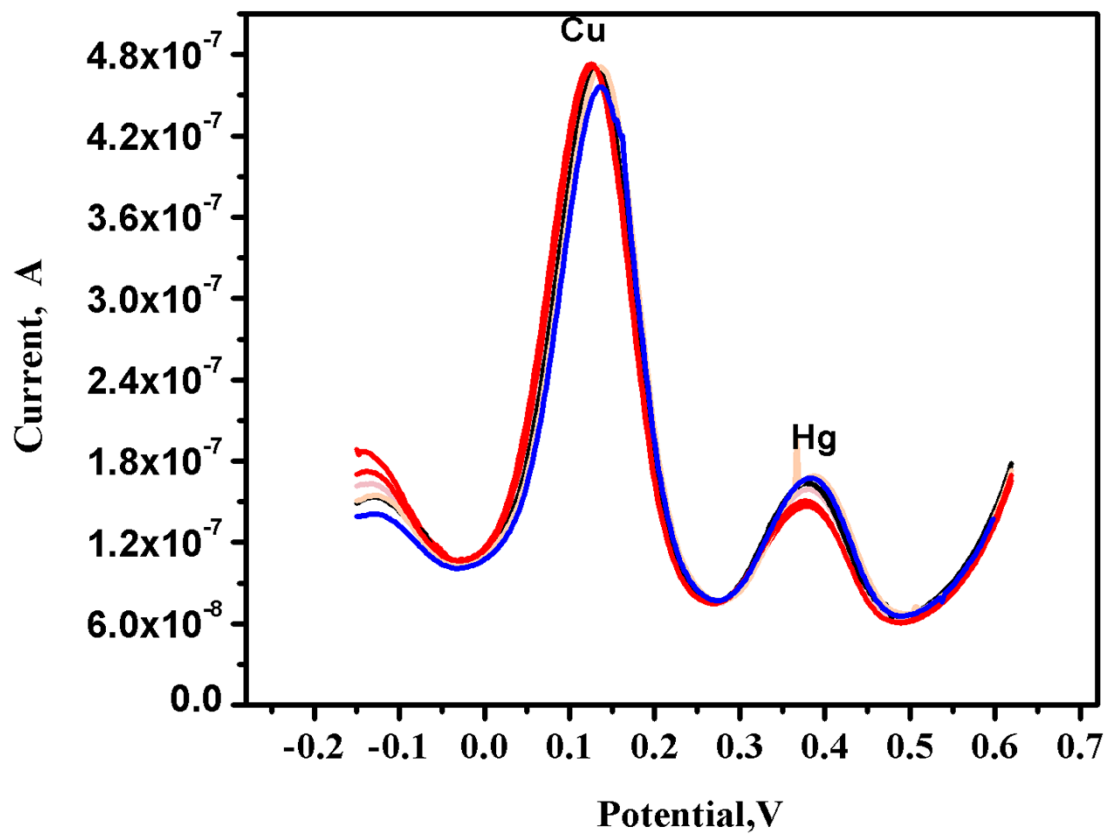

Figure S6. Repeatability of the voltammetric scans at  $15 \mu\text{gL}^{-1}$  of  $\text{Cu}^{2+}$  and  $2 \mu\text{gL}^{-1}$   $\text{Hg}^{2+}$ .
